# Supplementary material for: Trichoderma harzianum Volatile Organic Compounds Regulated by the THCTF1 Transcription Factor Are Involved in Antifungal Activity and Beneficial Plant Responses
Source: MDPI journal article supplement (doi:10.3390/jof9060654), 2023-06-11
Supplement: s1 [file s1]

**Table S2.** Putative identification of VOCs identified through PTR-Qi-TOF-MS analysis. (a) Compound rank (b) Mass to charge ratio measured by the Mass Spectrometer (c) Compound's chemical formula (H<sup>+</sup> added by protonation) (d) Putative identifications (e) Compound classification based on their chemical and biochemical properties (f) Fungal volatile emission using PTR-ToF-MS citations (g) PTR-TOF citations (h) Fungal VOCs citations.

| Compound (a) | Measured Mass m/z (b) | Protonated chemical formula (c)              | Putative identifications (d)                            | Chemical and functional grouping (e) | Fungal volatile emission using PTR-ToF-MS citations (f) | PTR-TOF citations (g) | Fungal VOCs citations (h) |
|--------------|-----------------------|----------------------------------------------|---------------------------------------------------------|--------------------------------------|---------------------------------------------------------|-----------------------|---------------------------|
| 1            | 29.040                | C <sub>2</sub> H <sub>5</sub> <sup>+</sup>   | Ethylene; Ethyl radical (Ethanol fragment)              | Hydrocarbon                          | [48]                                                    |                       |                           |
| 2            | 31.018                | CH <sub>3</sub> O <sup>+</sup>               | Formaldehyde                                            | Carbonyl compounds                   | [48]                                                    |                       |                           |
| 3            | 33.033                | CH <sub>5</sub> O <sup>+</sup>               | Methanol                                                | Alcohols                             | [48]                                                    |                       |                           |
| 4            | 39.024                | C <sub>3</sub> H <sub>3</sub> <sup>+</sup>   | Isoprene fragment                                       | Hydrocarbon                          |                                                         | [56,57]               |                           |
| 5            | 40.026                | -                                            | Unknown                                                 |                                      |                                                         |                       |                           |
| 6            | 41.040                | C <sub>3</sub> H <sub>5</sub> <sup>+</sup>   | Alkyl fragment; 2-Methyl-3-buten-2-ol; Acetone fragment | Hydrocarbon                          |                                                         | [58,59]               |                           |
| 7            | 42.009                | -                                            | Unknown                                                 |                                      |                                                         |                       |                           |
| 8            | 42.042                | C <sub>3</sub> H <sub>5</sub> <sup>+</sup>   | Alkyl fragment                                          | Hydrocarbon                          | [49]                                                    |                       |                           |
| 9            | 43.020                | C <sub>2</sub> H <sub>3</sub> O <sup>+</sup> | Acetic acid fragment                                    | Carboxylic acids                     | [48,50]                                                 |                       |                           |
| 10           | 43.055                | C <sub>3</sub> H <sub>7</sub> <sup>+</sup>   | Alkyl fragment                                          | Hydrocarbon                          |                                                         | [60]                  |                           |
| 11           | 45.034                | C <sub>2</sub> H <sub>5</sub> O <sup>+</sup> | Acetaldehyde                                            | Carbonyl compounds                   | [48]                                                    |                       |                           |
| 12           | 47.043                | C <sub>2</sub> H <sub>7</sub> O <sup>+</sup> | Ethanol                                                 | Alcohols                             | [48]                                                    |                       |                           |
| 13           | 49.010                | CH <sub>5</sub> S <sup>+</sup>               | Methanethiol                                            | Sulphur compounds                    | [48]                                                    |                       |                           |
| 14           | 49.028                | -                                            | Unknown                                                 |                                      |                                                         |                       |                           |
| 15           | 53.002                | C <sub>3</sub> OH <sup>+</sup>               | Fragment (ester)                                        | Carbonyl compounds                   |                                                         | [61]                  |                           |
| 16           | 53.013                | -                                            | Unknown                                                 |                                      |                                                         |                       |                           |
| 17           | 53.039                | C <sub>4</sub> H <sub>5</sub> <sup>+</sup>   | Cyclobutadiene                                          | Hydrocarbon                          | [48]                                                    |                       |                           |
| 18           | 54.033                | -                                            | Unknown                                                 |                                      |                                                         |                       |                           |
| 19           | 55.016                | -                                            | Unknown                                                 |                                      |                                                         |                       |                           |
| 20           | 57.032                | C <sub>3</sub> H <sub>5</sub> O <sup>+</sup> | 2-Propenal (Acrolein)                                   | Carbonyl compounds                   | [48]                                                    |                       |                           |
| 21           | 57.070                | C <sub>4</sub> H <sub>9</sub> <sup>+</sup>   | 1-Butene (Alkyl fragment); Butanol fragment             | Hydrocarbon                          | [48]                                                    | [62]                  |                           |

|    |        |          |                                                           |                    |         |         |  |
|----|--------|----------|-----------------------------------------------------------|--------------------|---------|---------|--|
| 22 | 59.051 | C3H7O+   | Acetone                                                   | Carbonyl compounds | [48]    |         |  |
| 23 | 61.026 | C2H5O2+  | Acetic acid                                               | Carboxylic acids   | [48]    |         |  |
| 24 | 63.045 | C2H6O2H+ | Acetaldehyde-water cluster                                | Carbonyl compounds |         | [61]    |  |
| 25 | 67.053 | C5H7+    | 3-Penten-1-yne; 2-Pentalal fragment-; 1,3-Cyclopentadiene | Alkenes            | [48]    | [61,63] |  |
| 26 | 69.033 | C4H5O+   | Furan                                                     | Terpenes           | [48]    |         |  |
| 27 | 69.069 | C5H9+    | 2-Methyl-1,3-butadiene (isoprene); Cyclopentene           | Alkenes            | [48]    |         |  |
| 28 | 71.049 | C4H7O+   | 3-Buten-2-one (Methyl vinyl ketone); Methacrolein         | Carbonyl compounds | [48]    |         |  |
| 29 | 74.004 | -        | Unknown                                                   |                    |         |         |  |
| 30 | 74.099 | -        | Unknown                                                   |                    |         |         |  |
| 31 | 75.027 | -        | Unknown                                                   |                    |         |         |  |
| 32 | 75.081 | C4H11O+  | 2-Methyl-1-propanol (isobutanol)                          | Alcohols           | [48]    |         |  |
| 33 | 77.059 | -        | Unknown                                                   |                    |         |         |  |
| 34 | 79.038 | -        | Unknown                                                   |                    |         |         |  |
| 35 | 79.053 | C6H7+    | Methanol trimer or Phenyl ion or Benzene                  | Benzenoids         |         | [60]    |  |
| 36 | 79.074 | -        | Unknown                                                   |                    |         |         |  |
| 37 | 81.034 | C5H5O+   | 2,4-Cyclopentadiene-1-one                                 | Carbonyl compounds |         | [63]    |  |
| 38 | 81.069 | C6H9+    | Alkyl fragment (hexenals/hexenols/terpenoids)             | Hydrocarbon        | [48]    |         |  |
| 39 | 83.048 | C5H7O+   | 2-Methyl furan                                            | Terpenes           | [48]    | [61]    |  |
| 40 | 83.068 | -        | Unknown                                                   |                    |         |         |  |
| 41 | 83.083 | C6H11+   | Hexanal fragment; 2,3-Dimethyl-1,3-butadiene              | Alkenes            | [51,52] | [61]    |  |
| 42 | 85.064 | C5H9O+   | Pentenone; Cyclopentanone                                 | Carbonyl compounds | [50]    |         |  |
| 43 | 85.100 | C6H15O+  | Hexanol fragment                                          | Alcohols           |         | [60,61] |  |
| 44 | 87.044 | C4H7O2+  | Butan-4-olide                                             | Carbonyl compounds | [48]    |         |  |

|    |         |                                                            |                                                              |                        |         |      |  |
|----|---------|------------------------------------------------------------|--------------------------------------------------------------|------------------------|---------|------|--|
| 45 | 87.080  | C <sub>5</sub> H <sub>11</sub> O <sup>+</sup>              | 2-Methylbutanal; Pentanal; Pentanone                         | Carbonyl compounds     | [48,52] |      |  |
| 46 | 89.059  | C <sub>4</sub> H <sub>9</sub> O <sub>2</sub> <sup>+</sup>  | Butanoic acid; Ethyl acetate; 3-Hydroxy-2-butanone (Acetoin) | Carboxylic acids/ester | [48]    |      |  |
| 47 | 89.085  | -                                                          | Unknown                                                      |                        |         |      |  |
| 48 | 91.056  | C <sub>7</sub> H <sub>7</sub> <sup>+</sup>                 | Xylene fragment                                              | Benzenoids             |         | [56] |  |
| 49 | 91.074  | C <sub>4</sub> H <sub>11</sub> O <sub>2</sub> <sup>+</sup> | 2,3-Butanediol                                               | Alcohols               | [48]    | [61] |  |
| 50 | 92.060  | -                                                          | Unknown                                                      |                        |         |      |  |
| 51 | 93.037  | C <sub>3</sub> H <sub>9</sub> OS <sup>+</sup>              | 2-Methyl-mercaptoethanol                                     | Sulfur compounds       | [48]    |      |  |
| 52 | 93.069  | C <sub>7</sub> H <sub>9</sub> <sup>+</sup>                 | Monoterpene fragment                                         | Hydrocarbon            |         | [56] |  |
| 53 | 93.090  | C <sub>7</sub> H <sub>9</sub> <sup>+</sup>                 | Methylbenzene (Toluene)                                      | Benzenoids             | [52]    |      |  |
| 54 | 95.085  | C <sub>7</sub> H <sub>11</sub> <sup>+</sup>                | Monoterpene fragment                                         | Terpenes               |         | [57] |  |
| 55 | 97.028  | C <sub>5</sub> H <sub>5</sub> O <sub>2</sub> <sup>+</sup>  | Furfural; 2-Furancarboxaldehyde                              | Carbonyl compounds     | [48]    |      |  |
| 56 | 97.064  | C <sub>6</sub> H <sub>9</sub> O <sup>+</sup>               | 2,4-Dimethylfuran                                            | Terpenes               | [48]    |      |  |
| 57 | 97.100  | -                                                          | Unknown                                                      |                        |         |      |  |
| 58 | 99.081  | C <sub>6</sub> H <sub>11</sub> O <sup>+</sup>              | Hexenal isomeres                                             | Carbonyl compounds     | [51]    |      |  |
| 59 | 101.059 | C <sub>5</sub> H <sub>9</sub> O <sub>2</sub> <sup>+</sup>  | Oxo-pentanal; Pentane-2,3-dione; $\gamma$ -valerolactone     | Carbonyl compounds     | [48,50] |      |  |
| 60 | 101.096 | C <sub>6</sub> H <sub>13</sub> O <sup>+</sup>              | Hexanal; Hexanone                                            | Carbonyl compounds     |         | [63] |  |
| 61 | 103.076 | C <sub>5</sub> H <sub>11</sub> O <sub>2</sub> <sup>+</sup> | 4-Hydroxy-3-methyl-2-butanone                                | Carbonyl compounds     | [48]    |      |  |
| 62 | 105.070 | C <sub>4</sub> H <sub>9</sub> O <sub>3</sub> <sup>+</sup>  | 4-Hydroxybutanoic acid                                       | Carboxylic acids/ester | [51]    |      |  |
| 63 | 107.049 | C <sub>7</sub> H <sub>7</sub> O <sup>+</sup>               | Benzaldehyde                                                 | Carbonyl compounds     | [53]    | [61] |  |
| 64 | 107.068 | -                                                          | Unknown                                                      |                        |         |      |  |
| 65 | 107.084 | C <sub>8</sub> H <sub>11</sub> <sup>+</sup>                | Ethylbenzene; Dimethylbenzene (Xylene); Monoterpene fragment | Benzenoids             | [48]    | [56] |  |
| 66 | 107.105 | -                                                          | Unknown                                                      |                        |         |      |  |
| 67 | 109.102 | -                                                          | Unknown                                                      |                        |         |      |  |
| 68 | 111.046 | C <sub>6</sub> H <sub>7</sub> O <sub>2</sub> <sup>+</sup>  | 2-Acetylfuran                                                | Terpenes               | [48]    |      |  |

|    |         |           |                                                                                                       |                                           |      |      |      |
|----|---------|-----------|-------------------------------------------------------------------------------------------------------|-------------------------------------------|------|------|------|
| 69 | 111.080 | -         | Unknown                                                                                               |                                           |      |      |      |
| 70 | 111.115 | C8H15+    | 4-Methyl-1,3-heptadiene                                                                               | Alkenes                                   | [48] |      |      |
| 71 | 117.090 | C6H13O2+  | Acetone dimer; Hexanoic acid; Ethylbutanoate                                                          | Fatty acid esters                         | [51] |      |      |
| 72 | 119.049 | C6H15S+   | 1-(Methylthio) pentane; Benzofuran                                                                    | Sulfur compounds                          | [48] |      |      |
| 73 | 119.085 | C9H11+    | Indane; Methyl-styrene                                                                                | Benzenoids                                |      | [63] |      |
| 74 | 119.106 | -         | Unknown                                                                                               |                                           |      |      |      |
| 75 | 121.068 | C5H13OS+  | 2-Hydroxyethyl propyl sulfide                                                                         | Sulfur compounds                          | [48] |      |      |
| 76 | 121.101 | C9H13+    | 1,2,4-Trimethylbenzene                                                                                | Benzenoids                                | [48] |      |      |
| 77 | 121.121 | C9H13+    | 1-Ethyl-3-methyl-benzene; Propyl-benzene; Monoterpene ( <i>p</i> -cymene) fragment                    | Benzenoids                                | [50] | [56] |      |
| 78 | 123.044 | C4H11O2S+ | Diethanol sulfide                                                                                     | Sulfur compound                           | [48] |      |      |
| 79 | 123.080 | C8H11O+   | 1-Methoxy-3-methylbenzene                                                                             | Benzenoids                                | [48] |      |      |
| 80 | 123.116 | C9H15+    | Sesquiterpene fragments                                                                               | Sesquiterpenoids                          | [54] |      |      |
| 81 | 127.112 | C8H15O+   | 2-Octenal/1-Octen-3-one                                                                               | Carbonyl compounds                        | [51] |      |      |
| 82 | 129.090 | C7H13O2+  | 5-Propyldihydro-2(3H)-furanone; $\gamma$ -Heptalactone; 2-Methyl-2E-hexenoic acid; 4-Pentenyl acetate | Carbonyl compounds/Carboxylic acids/ester |      | [61] | [66] |
| 83 | 129.127 | C8H17O+   | Octanal; 1-Octen-3-ol; 3-Octanone                                                                     | Carbonyl compounds                        | [51] |      |      |
| 84 | 131.107 | -         | Unknown                                                                                               |                                           |      |      |      |
| 85 | 135.081 | C9H11O+   | 3-Methylacetophenone                                                                                  | Carbonyl compounds                        |      | [63] |      |
| 86 | 135.111 | C10H15+   | <i>p</i> -Cymene                                                                                      | Terpenes                                  | [48] |      |      |
| 87 | 135.137 | -         | Unknown                                                                                               |                                           |      |      |      |
| 88 | 137.133 | C10H17+   | Monoterpenes                                                                                          | Terpenes                                  | [48] |      |      |
| 89 | 139.075 | C8H11O2+  | 2-Methoxy-4-methylphenol (Creosol)                                                                    | Alcohols                                  |      | [63] | [67] |

|     |         |                                                             |                                                                            |                        |      |      |         |
|-----|---------|-------------------------------------------------------------|----------------------------------------------------------------------------|------------------------|------|------|---------|
| 90  | 139.112 | C <sub>9</sub> H <sub>15</sub> O <sup>+</sup>               | 2-Pentylfuran; Tyrosol                                                     | Terpenes               | [48] |      |         |
| 91  | 139.145 | -                                                           | Unknown                                                                    |                        |      |      |         |
| 92  | 143.106 | C <sub>8</sub> H <sub>15</sub> O <sub>2</sub> <sup>+</sup>  | 2,3-Octanedione                                                            | Carbonyl compounds     | [48] |      |         |
| 93  | 143.144 | C <sub>9</sub> H <sub>19</sub> O <sup>+</sup>               | Nonanal; Nonanone; 3,5-dimethyl-4-heptanone/2(3H)-Furanone; 5-butyldihydro | Carbonyl compounds     | [49] | [61] |         |
| 94  | 145.122 | C <sub>9</sub> H <sub>21</sub> O <sup>+</sup>               | Dimer of tetrahydrofuran; Octanoic acid                                    | Alcohols               | [55] | [64] |         |
| 95  | 147.116 | C <sub>11</sub> H <sub>15</sub> <sup>+</sup>                | Cyclopentylbenzene                                                         | Benzenoids             |      | [57] |         |
| 96  | 147.138 | C <sub>8</sub> H <sub>19</sub> S <sup>+</sup>               | 2-Ethyl-1-hexanethiol                                                      | Sulfur compounds       | [48] |      |         |
| 97  | 149.132 | C <sub>11</sub> H <sub>17</sub> <sup>+</sup>                | 1-Ethylpropyl-benzene                                                      | Benzenoids             | [48] |      |         |
| 98  | 151.109 | -                                                           | Unknown                                                                    |                        |      |      |         |
| 99  | 151.148 | C <sub>6</sub> H <sub>15</sub> S <sub>2</sub> <sup>+</sup>  | Methyl pentyl disulfide                                                    | Sulfur compounds       | [48] |      |         |
| 100 | 155.146 | -                                                           | Unknown                                                                    |                        |      |      |         |
| 101 | 157.121 | -                                                           | Unknown                                                                    |                        |      |      |         |
| 102 | 157.158 | C <sub>10</sub> H <sub>21</sub> O <sup>+</sup>              | Decanal                                                                    | Carbonyl compounds     | [48] |      |         |
| 103 | 159.138 | C <sub>9</sub> H <sub>19</sub> O <sub>2</sub> <sup>+</sup>  | 2-Methylbutyl 2-methylpropanoate; 2-Methylbutyl isobutyrate"               | Carboxylic acids/ester | [48] |      |         |
| 104 | 161.134 | -                                                           | Unknown                                                                    |                        |      |      |         |
| 105 | 163.147 | C <sub>12</sub> H <sub>19</sub>                             | Sesquiterpene fragment                                                     | Terpenes               |      | [57] |         |
| 106 | 167.056 | -                                                           | Unknown                                                                    |                        |      |      |         |
| 107 | 167.108 | C <sub>10</sub> H <sub>15</sub> O <sub>2</sub> <sup>+</sup> | 6-Pentyl-2H-pyran-2-one (6PP)                                              | Carbonyl compounds     |      |      | [68-70] |
| 108 | 167.144 | C <sub>11</sub> H <sub>19</sub> O <sup>+</sup>              | 2-Heptylfuran                                                              | Terpenes               | [48] |      |         |
| 109 | 173.134 | -                                                           | Unknown                                                                    |                        |      |      |         |
| 110 | 177.161 | -                                                           | Unknown                                                                    |                        |      |      |         |
| 111 | 181.159 | -                                                           | Unknown                                                                    |                        |      |      |         |
| 112 | 189.128 | -                                                           | Unknown                                                                    |                        |      |      |         |
| 113 | 191.145 | C <sub>13</sub> H <sub>19</sub> O <sup>+</sup>              | (E)-β-Damascenone                                                          | Carbonyl compounds     |      | [57] |         |
| 114 | 193.160 | C <sub>13</sub> H <sub>21</sub> O <sup>+</sup>              | β-Ionone                                                                   | Carbonyl compounds     |      | [65] |         |

|     |         |          |                                                               |                       |      |      |      |
|-----|---------|----------|---------------------------------------------------------------|-----------------------|------|------|------|
| 115 | 195.175 | C13H23O+ | 6,10-Dimethyl-5,9-undecadien-2-one (Geranylacetone)           | Carbonyl compounds    | [48] |      |      |
| 116 | 203.180 | C15H23+  | Sesquiterpenes (eg. curcumene. calamene) and Terpene fragment | Terpene               |      | [57] |      |
| 117 | 205.197 | C15H25+  | Sesquiterpenes                                                | Sesquiterpenoides     | [48] |      |      |
| 118 | 207.140 | -        | Unknown                                                       |                       |      |      |      |
| 119 | 209.155 | -        | Unknown                                                       |                       |      |      |      |
| 120 | 221.151 | -        | Unknown                                                       |                       |      |      |      |
| 121 | 221.191 | C15H25O+ | Caryophyllene oxide                                           | Terpenoids            |      | [57] | [71] |
| 122 | 223.064 | -        | Unknown                                                       |                       |      |      |      |
| 123 | 223.206 | C15H27O+ | Cedrol; Nerolidol                                             | Sesquiterpene alcohol | [48] |      |      |
| 124 | 225.046 | -        | Unknown                                                       |                       |      |      |      |
| 125 | 227.039 | -        | Unknown                                                       |                       |      |      |      |
| 126 | 231.889 | -        | Unknown                                                       |                       |      |      |      |
| 127 | 265.856 | -        | Unknown                                                       |                       |      |      |      |
| 128 | 266.856 | -        | Unknown                                                       |                       |      |      |      |
| 129 | 297.082 | -        | Unknown                                                       |                       |      |      |      |
| 130 | 299.061 | -        | Unknown                                                       |                       |      |      |      |
