# Supplementary material for: Trichoderma harzianum Volatile Organic Compounds Regulated by the THCTF1 Transcription Factor Are Involved in Antifungal Activity and Beneficial Plant Responses
Source: MDPI journal article supplement (doi:10.3390/jof9060654), 2023-06-11
Supplement: s1 [file s1]

**Table S1.** Oligonucleotides used for qPCR analysis of *Trichoderma* and *Arabidopsis* genes.

| Organism           | Name       | Sequences (5' → 3')       | Gene encoding                                                     | References |
|--------------------|------------|---------------------------|-------------------------------------------------------------------|------------|
| <i>Trichoderma</i> | LAE-fw2    | GCCATGAGCATGATGCCTATG     | Putative methyltransferase (LAE1)                                 | This work  |
|                    | LAE-rev2   | AGTAGGCGTGGTAGCGCAGAA     |                                                                   | This work  |
|                    | 5468-fw    | GACGTCGTCGGATTGGACTAT     | Putative thiopurine S-methyltransferase                           | This work  |
|                    | 5468-rev   | GCCCTCCTCAATCGACTTGTA     |                                                                   | This work  |
|                    | 81579-fw   | AGGGCGATGCTAATGCTCTCA     | Putative SAM-methyltransferase                                    | This work  |
|                    | 81579-rev  | GGATACCAGATGAAGCCTCCA     |                                                                   | This work  |
|                    | 506014-fw  | AAAAGAGACGAGCTTGCCGC      | Putative SAM-methyltransferase                                    | This work  |
|                    | 506014-rev | CGCTCTAAGAGTTGTGATGCC     |                                                                   | This work  |
|                    | 492690-fw  | CTGGCGGCTACCTTGAGTT       | Putative prohibitin protein containing a methyltransferase domain | This work  |
|                    | 492690-rev | GCCCAGCCACAGCTTTGTT       |                                                                   | This work  |
|                    | Act-1      | ATCGGTATGGGTCAGAAGGA      | Actin                                                             | [44]       |
| <i>Arabidopsis</i> | Act-2      | ATGTCAACACGAGCAATGG       |                                                                   | [44]       |
|                    | PR-1-fw    | CAAAGTGAGGTGTAACAATGGTGGA | Pathogenesis-related protein 1 (PR-1)                             | This work  |
|                    | PR-1-rev   | ATGGCTTCTCGTTCACATAATTCCC |                                                                   | This work  |
|                    | VSP2-fw    | GTTAGGGACCGGAGCATCAA      | Vegetative storage protein 2 (VSP2)                               | This work  |
|                    | VSP2-rev   | TCAATCCCGAGCTCTATGATGTT   |                                                                   | This work  |
|                    | PDF1.5-fw  | GGTTGCTCTTGTTCTCTTTGCT    | Plant defensin 1.5 (PDF1.5)                                       | This work  |
|                    | PDF1.5-rev | CTCTGCACTGATAATCGTTTACAC  |                                                                   | This work  |
|                    | Actin-fw   | CTCCCGCTATGTATGTCGCC      | Actin                                                             | [45]       |
|                    | Actin-rev  | TTGGCACAGTGTGAGACACAC     |                                                                   | [45]       |
