# Supplementary material for: Trichoderma harzianum Volatile Organic Compounds Regulated by the THCTF1 Transcription Factor Are Involved in Antifungal Activity and Beneficial Plant Responses
Source: MDPI journal article supplement (doi:10.3390/jof9060654), 2023-06-11
Supplement: s1 [file s1]

**Table S3.** Significantly different VOCs identified according to one-way analysis of variance (ANOVA) followed by Fisher's least significant difference method (Fisher's LSD) analysis ( $p < 0.05$ ) emitted by the three *Trichoderma* strains, at 5 and 9 days after inoculation (T34 = wild type; Dj =  $\Delta$ J3-16 ectopic integration transformant; DD =  $\Delta$ D1-38 disruptant transformant).

| 5 days data set    |                |                |                    |            |              |          | 9 days data set |                |                |                    |          |              |          |          |
|--------------------|----------------|----------------|--------------------|------------|--------------|----------|-----------------|----------------|----------------|--------------------|----------|--------------|----------|----------|
|                    | <i>f</i> value | <i>p</i> value | -LOG10( <i>p</i> ) | FDR        | Fisher's LSD |          |                 | <i>f</i> value | <i>p</i> value | -LOG10( <i>p</i> ) | FDR      | Fisher's LSD |          |          |
| m/z 61.026+BB5:H43 | 1903.1         | 1.50E-12       | 11.823             | 9.5511E-11 | DD - Dj      | DD - T34 | m/z 85.064      | 1191.9         | 1.23E-11       | 1.09E+01           | 1.38E-09 | DD - Dj      | DD - T34 |          |
| m/z 129.090        | 474.6          | 7.54E-10       | 9.1225             | 1.9159E-08 | DD - Dj      | DD - T34 | m/z 107.105     | 1055.1         | 2.12E-11       | 1.07E+01           | 1.38E-09 | DD - Dj      | DD - T34 |          |
| m/z 79.038         | 214.1          | 2.58E-08       | 7.589              | 4.0899E-07 | DD - Dj      | DD - T34 | m/z 71.049      | 302.37         | 5.60E-09       | 8.25E+00           | 1.46E-07 | DD - Dj      | DD - T34 |          |
| m/z 101.059        | 123.04         | 2.91E-07       | 6.5359             | 4.1081E-06 | DD - Dj      | DD - T34 | m/z 95.08       | 259.04         | 1.11E-08       | 7.95E+00           | 2.41E-07 | DD - Dj      | DD - T34 |          |
| m/z 147.138        | 19.098         | 5.77E-04       | 3.2385             | 0.0067853  | DD - Dj      | DD - T34 | m/z 29.040      | 241.35         | 1.52E-08       | 7.82E+00           | 2.82E-07 | DD - Dj      | DD - T34 |          |
| m/z 129.127        | 18.391         | 6.62E-04       | 3.179              | 0.0067853  | DD - Dj      | DD - T34 | m/z 79.053      | 109.98         | 4.73E-07       | 6.32E+00           | 6.84E-06 | DD - Dj      | DD - T34 |          |
| m/z 87.080         | 18.149         | 6.95E-04       | 3.1583             | 0.0067853  | DD - Dj      | DD - T34 | m/z 161.134     | 99.284         | 7.36E-07       | 6.13E+00           | 9.57E-06 | DD - Dj      | DD - T34 |          |
| m/z 119.049        | 15.742         | 1.15E-03       | 2.9387             | 0.0079333  | DD - Dj      | DD - T34 | m/z 121.068     | 19.469         | 5.38E-04       | 3.27E+00           | 5.26E-03 | DD - Dj      | DD - T34 |          |
| m/z 43.02          | 15.701         | 1.16E-03       | 2.9347             | 0.0079333  | DD - Dj      | DD - T34 | m/z 119.106     | 19.221         | 5.64E-04       | 3.25E+00           | 5.26E-03 | DD - Dj      | DD - T34 |          |
| m/z 40.026         | 15.683         | 1.17E-03       | 2.933              | 0.0079333  | DD - Dj      | DD - T34 | m/z 123.080     | 18.985         | 5.90E-04       | 3.23E+00           | 5.26E-03 | DD - Dj      | DD - T34 | T34 - Dj |
| m/z 39.024         | 15.475         | 1.22E-03       | 2.9128             | 0.0079333  | DD - Dj      | DD - T34 | m/z 137.133     | 18.473         | 6.52E-04       | 3.19E+00           | 5.26E-03 | DD - Dj      | DD - T34 |          |
| m/z 59.051         | 14.926         | 1.39E-03       | 2.8583             | 0.0079333  | DD - Dj      | DD - T34 | m/z 123.044     | 18.178         | 6.91E-04       | 3.16E+00           | 5.26E-03 | DD - Dj      | DD - T34 |          |
| m/z 85.064         | 14.774         | 1.44E-03       | 2.8429             | 0.0079333  | DD - Dj      | DD - T34 | m/z 42.009      | 17.911         | 7.28E-04       | 3.14E+00           | 5.26E-03 | DD - Dj      | DD - T34 |          |
| m/z 127.112        | 12.209         | 2.73E-03       | 2.5639             | 0.011955   | DD - Dj      | DD - T34 | m/z 147.138     | 17.909         | 7.29E-04       | 3.14E+00           | 5.26E-03 | DD - Dj      | DD - T34 |          |
| m/z 266.856        | 12.053         | 2.85E-03       | 2.5455             | 0.012054   | DD - Dj      | DD - T34 | m/z 151.148     | 16.668         | 9.42E-04       | 3.03E+00           | 5.65E-03 | DD - Dj      | DD - T34 |          |
| m/z 265.856        | 11.26          | 3.55E-03       | 2.4496             | 0.014096   | DD - Dj      | DD - T34 | m/z 101.059     | 16.596         | 9.56E-04       | 3.02E+00           | 5.65E-03 | DD - Dj      | DD - T34 |          |
| m/z 77.059         | 9.3493         | 6.35E-03       | 2.197              | 0.02069    | DD - Dj      | DD - T34 | m/z 147.116     | 14.093         | 1.69E-03       | 2.77E+00           | 8.93E-03 | DD - Dj      | DD - T34 |          |
| m/z 107.068        | 9.197          | 6.68E-03       | 2.1754             | 0.021202   | DD - Dj      | DD - T34 | m/z 89.059      | 13.929         | 1.76E-03       | 2.76E+00           | 8.93E-03 | DD - Dj      | DD - T34 |          |
| m/z 145.122        | 8.6534         | 8.01E-03       | 2.0962             | 0.02482    | DD - Dj      | DD - T34 | m/z 107.049     | 13.501         | 1.95E-03       | 2.71E+00           | 9.07E-03 | DD - Dj      | DD - T34 |          |
| m/z 159.138        | 7.1706         | 1.37E-02       | 1.8625             | 0.041505   | DD - Dj      | DD - T34 | m/z 75.081      | 13.241         | 2.08E-03       | 2.68E+00           | 9.35E-03 | DD - Dj      | DD - T34 |          |
| m/z 54.033         | 6.8883         | 1.53E-02       | 1.8146             | 0.045261   | DD - Dj      | DD - T34 | m/z 43.02       | 12.681         | 2.41E-03       | 2.62E+00           | 1.01E-02 | DD - Dj      | DD - T34 |          |
| m/z 63.045         | 216.85         | 2.44E-08       | 7.6134             | 4.0899E-07 | DD - Dj      | T34 - Dj | m/z 92.060      | 12.172         | 2.76E-03       | 2.56E+00           | 1.10E-02 | DD - Dj      | DD - T34 | T34 - Dj |
| m/z 91.074         | 15.026         | 1.35E-03       | 2.8683             | 0.0079333  | DD - Dj      | T34 - Dj | m/z 105.070     | 12.11          | 2.80E-03       | 2.55E+00           | 1.10E-02 | DD - Dj      | DD - T34 |          |
| m/z 74.999         | 14.771         | 1.44E-03       | 2.8426             | 0.0079333  | DD - Dj      | T34 - Dj | m/z 149.132     | 11.432         | 3.38E-03       | 2.47E+00           | 1.29E-02 | DD - Dj      | DD - T34 |          |
| m/z 143.106        | 12.939         | 2.25E-03       | 2.6474             | 0.011      | DD - Dj      | T34 - Dj | m/z 157.121     | 10.712         | 4.16E-03       | 2.38E+00           | 1.55E-02 | DD - Dj      | DD - T34 |          |
| m/z 203.180        | 18.391         | 6.62E-04       | 3.1791             | 0.0067853  | DD - T34     | Dj - T34 | m/z 163.147     | 10.56          | 4.36E-03       | 2.36E+00           | 1.57E-02 | DD - Dj      | DD - T34 |          |
| m/z 119.085        | 12.463         | 2.55E-03       | 2.5933             | 0.011569   | DD - T34     | Dj - T34 | m/z 87.044      | 10.336         | 4.66E-03       | 2.33E+00           | 1.64E-02 | DD - Dj      | DD - T34 |          |
| m/z 107.084        | 10.142         | 4.95E-03       | 2.3057             | 0.018476   | DD - T34     | Dj - T34 | m/z 111.046     | 10.058         | 5.08E-03       | 2.29E+00           | 1.74E-02 | DD - Dj      | DD - T34 |          |

|             |        |          |        |            |          |          |             |        |          |          |          |          |          |  |
|-------------|--------|----------|--------|------------|----------|----------|-------------|--------|----------|----------|----------|----------|----------|--|
| m/z 91.056  | 9.6095 | 5.84E-03 | 2.2333 | 0.020008   | DD - T34 | Dj - T34 | m/z 129.127 | 9.9027 | 5.33E-03 | 2.27E+00 | 1.78E-02 | DD - Dj  | DD - T34 |  |
| m/z 123.080 | 9.5338 | 5.99E-03 | 2.2228 | 0.020008   | DD - T34 | Dj - T34 | m/z 167.056 | 9.5932 | 5.87E-03 | 2.23E+00 | 1.81E-02 | DD - Dj  | DD - T34 |  |
| m/z 143.144 | 3063.7 | 1.77E-13 | 12.752 | 2.2504E-11 | Dj - DD  | Dj - T34 | m/z 167.144 | 9.318  | 6.42E-03 | 2.19E+00 | 1.81E-02 | DD - Dj  | DD - T34 |  |
| m/z 181.159 | 1081.6 | 1.90E-11 | 10.722 | 8.0294E-10 | Dj - DD  | Dj - T34 | m/z 49.028  | 8.167  | 9.49E-03 | 2.02E+00 | 2.42E-02 | DD - Dj  | DD - T34 |  |
| m/z 151.148 | 277.79 | 8.15E-09 | 8.0887 | 1.7258E-07 | Dj - DD  | Dj - T34 | m/z 119.049 | 7.2804 | 1.32E-02 | 1.88E+00 | 3.23E-02 | DD - Dj  | DD - T34 |  |
| m/z 123.116 | 17.198 | 8.43E-04 | 3.0744 | 0.0076434  | Dj - DD  | Dj - T34 | m/z 69.069  | 454.01 | 9.19E-10 | 9.04E+00 | 2.99E-08 | DD - Dj  | T34 - Dj |  |
| m/z 83.048  | 15.104 | 1.33E-03 | 2.8761 | 0.0079333  | Dj - DD  | Dj - T34 | m/z 53.013  | 115.78 | 3.79E-07 | 6.42E+00 | 6.16E-06 | DD - Dj  | T34 - Dj |  |
| m/z 139.112 | 13.827 | 1.80E-03 | 2.7445 | 0.0095303  | Dj - DD  | Dj - T34 | m/z 91.056  | 17.078 | 8.64E-04 | 3.06E+00 | 5.61E-03 | DD - Dj  | T34 - Dj |  |
| m/z 83.083  | 13.056 | 2.19E-03 | 2.6604 | 0.011      | Dj - DD  | Dj - T34 | m/z 67.053  | 15.099 | 1.33E-03 | 2.88E+00 | 7.53E-03 | DD - Dj  | T34 - Dj |  |
| m/z 167.144 | 12.694 | 2.40E-03 | 2.6197 | 0.011291   | Dj - DD  | Dj - T34 | m/z 81.034  | 12.986 | 2.23E-03 | 2.65E+00 | 9.64E-03 | DD - Dj  | T34 - Dj |  |
| m/z 221.191 | 10.84  | 4.01E-03 | 2.3968 | 0.015436   | Dj - DD  | Dj - T34 | m/z 53.002  | 9.4652 | 6.12E-03 | 2.21E+00 | 1.81E-02 | DD - Dj  | T34 - Dj |  |
| m/z 69.069  | 9.8789 | 5.37E-03 | 2.2703 | 0.019472   | Dj - DD  | Dj - T34 | m/z 109.102 | 9.4471 | 6.16E-03 | 2.21E+00 | 1.81E-02 | DD - Dj  | T34 - Dj |  |
| m/z 193.160 | 9.681  | 5.71E-03 | 2.2432 | 0.020008   | Dj - T34 |          | m/z 42.042  | 9.3813 | 6.29E-03 | 2.20E+00 | 1.81E-02 | DD - Dj  | T34 - Dj |  |
| m/z 97.028  | 609.05 | 2.48E-10 | 9.6059 | 7.8683E-09 | T34 - DD | T34 - Dj | m/z 43.055  | 9.2197 | 6.63E-03 | 2.18E+00 | 1.83E-02 | DD - Dj  | T34 - Dj |  |
| m/z 107.049 | 11.465 | 3.35E-03 | 2.4747 | 0.013731   | T34 - DD | T34 - Dj | m/z 57.032  | 9.0326 | 7.05E-03 | 2.15E+00 | 1.91E-02 | DD - Dj  | T34 - Dj |  |
|             |        |          |        |            |          |          | m/z 39.024  | 8.8139 | 7.59E-03 | 2.12E+00 | 2.01E-02 | DD - Dj  | T34 - Dj |  |
|             |        |          |        |            |          |          | m/z 40.026  | 8.5439 | 8.32E-03 | 2.08E+00 | 2.16E-02 | DD - Dj  | T34 - Dj |  |
|             |        |          |        |            |          |          | m/z 77.059  | 616.92 | 2.34E-10 | 9.63E+00 | 1.01E-08 | DD - T34 | Dj - T34 |  |
|             |        |          |        |            |          |          | m/z 91.074  | 17.198 | 8.43E-04 | 3.07E+00 | 5.61E-03 | DD - T34 | Dj - T34 |  |
|             |        |          |        |            |          |          | m/z 87.080  | 9.7886 | 5.52E-03 | 2.26E+00 | 1.79E-02 | DD - T34 | Dj - T34 |  |
|             |        |          |        |            |          |          | m/z 59.051  | 9.4182 | 6.21E-03 | 2.21E+00 | 1.81E-02 | DD - T34 |          |  |
|             |        |          |        |            |          |          | m/z 83.048  | 7.5733 | 1.18E-02 | 1.93E+00 | 2.95E-02 | DD - T34 |          |  |
|             |        |          |        |            |          |          | m/z 103.076 | 19.511 | 5.34E-04 | 3.27E+00 | 5.26E-03 | Dj - DD  | Dj - T34 |  |
|             |        |          |        |            |          |          | m/z 155.146 | 13.863 | 1.79E-03 | 2.75E+00 | 8.93E-03 | Dj - DD  | Dj - T34 |  |
|             |        |          |        |            |          |          | m/z 119.085 | 13.69  | 1.86E-03 | 2.73E+00 | 8.97E-03 | Dj - DD  | Dj - T34 |  |
